# Supplementary material for: A Single Plasmid of Nisin-Controlled Bovine and Human Lactoferrin Expressing Elevated Antibacterial Activity of Lactoferrin-Resistant Probiotic Strains
Source: PubMed Central journal article supplement (PMC7911973; doi:10.3390/antibiotics10020120), 2021-01-27
Supplement: antibiotics-10-00120-s001.pdf [file antibiotics-10-00120-s001.pdf]

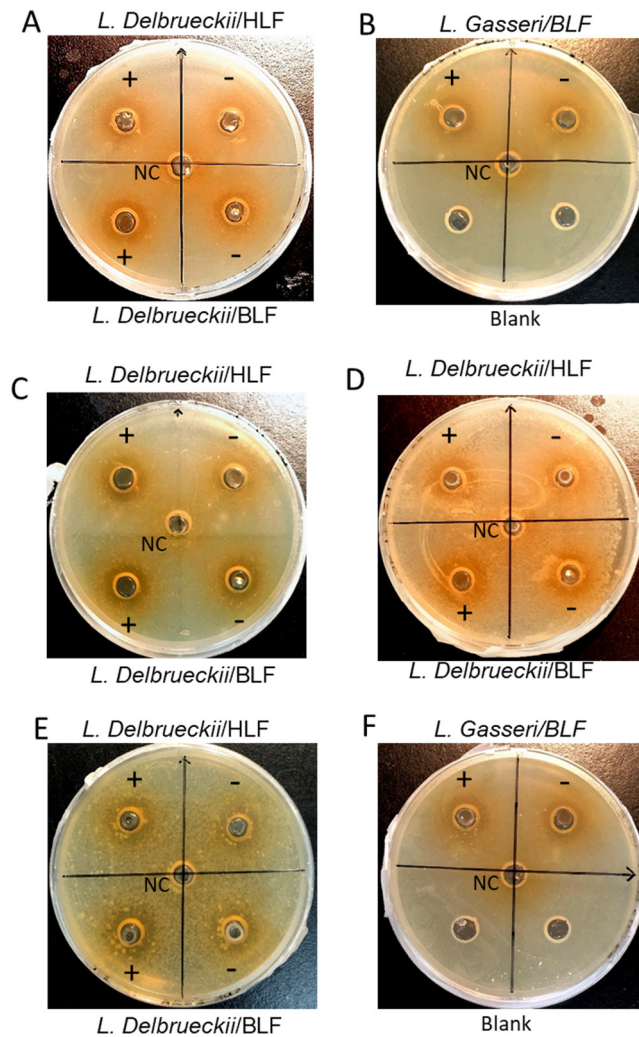

**Figure S1.** Representative inhibitory zones of agar diffusion test showing the antibacterial activity of cleared supernatants prepared from induced (+) and non-induced (-) recombinant probiotic strains. See materials and methods section for the experiment design. The tested pathogens are (A): *Escherichia coli*; (B)*Salmonella*; (C) *Enterococcus faecalis*; (D)*Salmonella enterica*; (E)*Staphylococcus aureus*; (F)*Staphylococcus aureus*; NC: negative control (MRS medium).

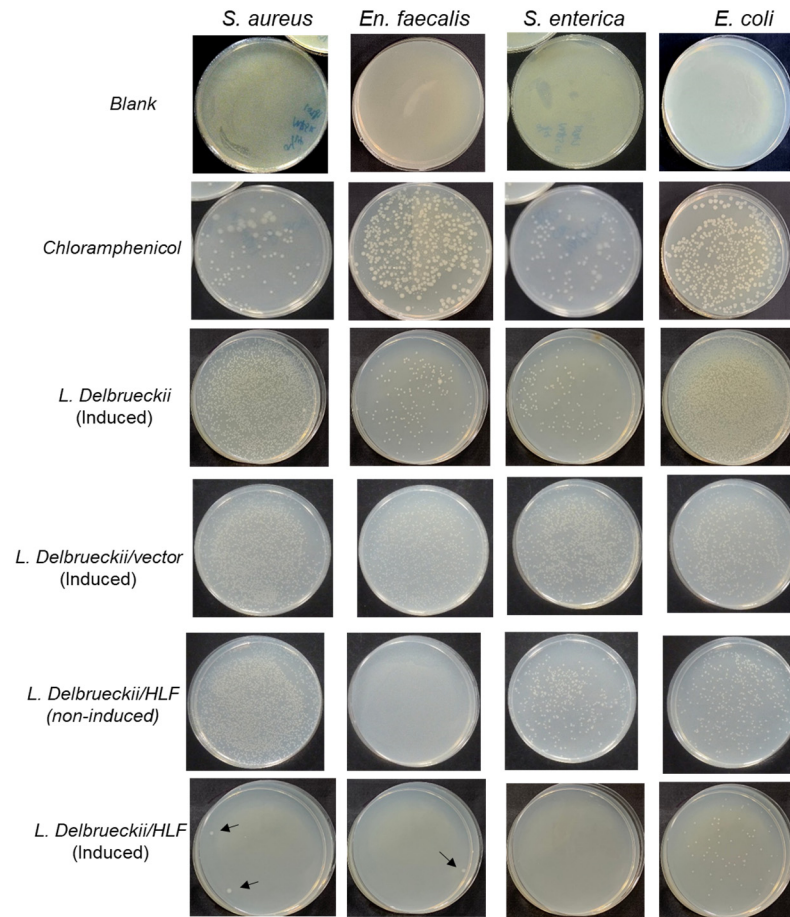

**Figure S2.** Effects of recombinant human lactoferrin cell lysates on the growth of four pathogenic bacterial strains. About 100 ml *L. Delbrueckii* (host control), *L. Delbrueckii*/pNZ8148 (vector control), *L. Delbrueckii*/HLF were induced protein expression for 5 hours using nisin. Cell pellets were harvested, washed by PBS twice, and then disrupted by sonication. Supernatants (cell lysates) were then harvested by centrifugation. Supernatants (200  $\mu$ L/assay) was mixed with pathogenic bacterial broth ( $1 \times 10^4$  cfu/mL; 300  $\mu$ L) in eppendorf, and these mixers were further incubated for 24 h at 37  $^{\circ}$ C. Then, 200  $\mu$ L of mixtures were further plated onto NA plates to reveal the remaining growth of bacterial colonies. The blank control presented as smear-type bacterial cultures, revealing countless pathogenic bacterial colonies grown on the NA plates. The final concentration of 12.5  $\mu$ g/mL chloramphenicol were also used as the control. Arrows indicated the grown of individual bacterial colonies, and the induced *L. Delbrueckii*/HLF almost completely blocked the growth of *S. aureus*, *En. Faecalis*, and *S. enterica*.

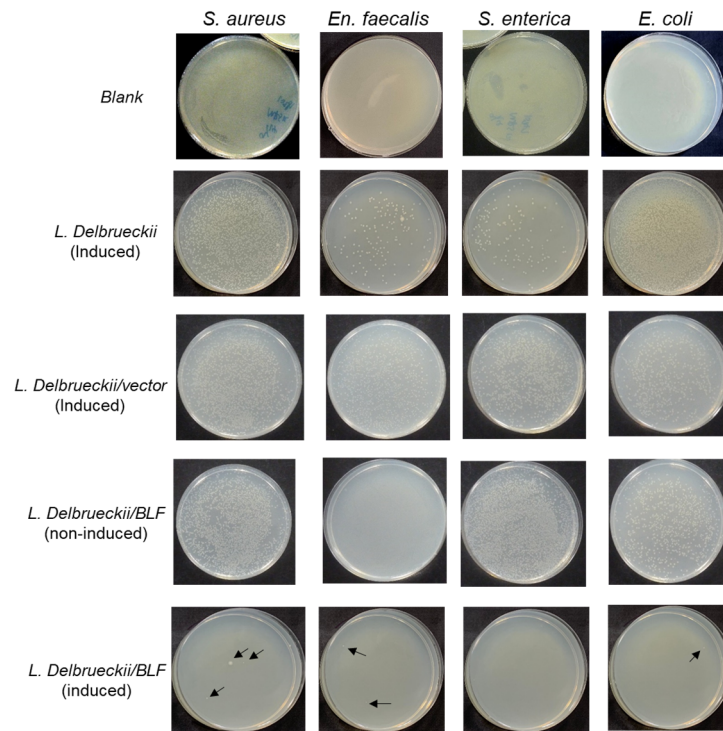

**Figure S3.** Effects of recombinant bovine lactoferrin cell lysates on the growth of four pathogenic bacterial strains. About 100 ml *L. Delbrueckii* (host control), *L. Delbrueckii*/pNZ8148 (vector control), *L. Delbrueckii*/BLF were induced protein expression for 5 hours using nisin. Cell pellets were harvested, washed by PBS twice, and then disrupted by sonication. Supernatants (cell lysates) were then harvested by centrifugation. Supernatants (200  $\mu$ L/assay) was mixed with pathogenic bacterial broth ( $1 \times 10^4$  cfu/ml; 300  $\mu$ L) in eppendorf, and these mixers were further incubated for 24 hours at 37°C. Then, 200  $\mu$ L of mixtures were further plated onto NA plates to reveal the remaining growth of bacterial colonies. The blank control presented as smear-type bacterial cultures, revealing countless pathogenic bacterial colonies grown on the NA plates. Arrows indicated the grown of individual bacterial colonies, and the induced *L. Delbrueckii*/BLF almost completely blocked the growth of *S. aureus*, *En. Faecalis*, *S. enterica*, and *E. coli*.

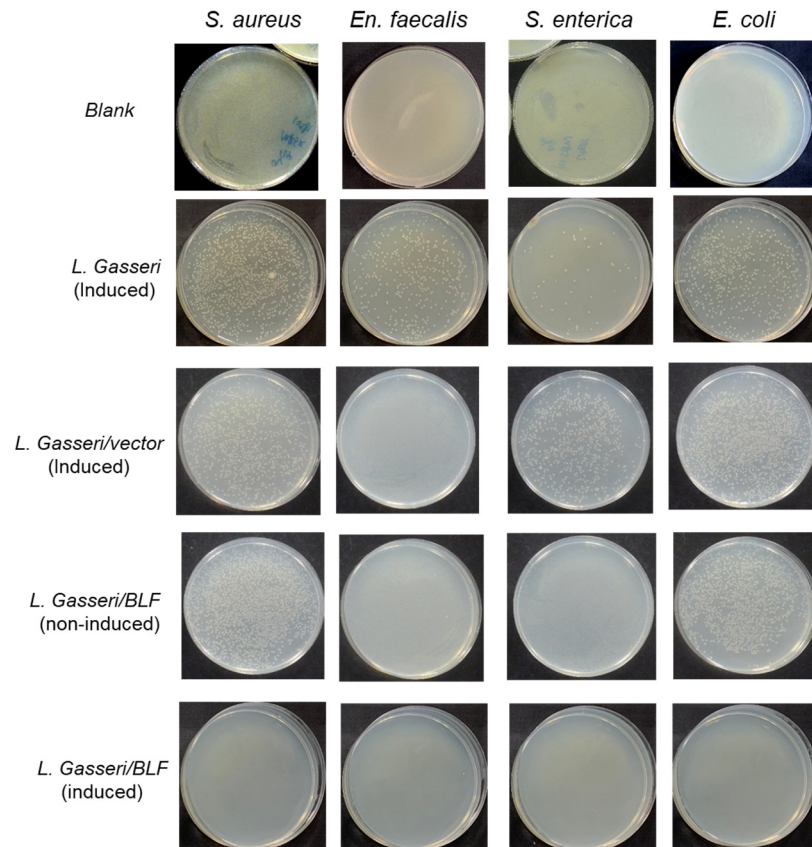

**Figure S4.** Effects of recombinant bovine lactoferrin cell lysates on the growth of four pathogenic bacterial strains. About 100 mL *L. Gasseri* (host control), *L. Gasseri*/pNZ8148 (vector control), *L. gasseri*/BLF were induced protein expression for 5 hours using nisin. Cell pellets were harvested, washed by PBS twice, and then disrupted by sonication. Supernatants (cell lysates) were then harvested by centrifugation. Supernatants (200  $\mu$ L/assay) was mixed with pathogenic bacterial broth ( $1 \times 10^4$  cfu/mL; 300  $\mu$ L) in eppendorf, and these mixers were further incubated for 24 h at 37  $^{\circ}$ C. Then, 200  $\mu$ L of mixtures were further plated onto NA plates to reveal the remaining growth of bacterial colonies. The blank control presented as smear-type bacterial cultures, revealing countless pathogenic bacterial colonies grown on the NA plates. Arrows indicated the grown of individual bacterial colonies, and the induced *L. gasseri*/BLF almost completely blocked the growth of *S. aureus*, *En. Faecalis*, *S. enterica*, and *E. coli*.
